# Supplementary material
Source: PubMed Central journal article supplement (PMC5114422)
Supplement: 10.1074_M116.749408_jbc.M116.749408-1.pdf [file 10.1074_M116.749408_jbc.M116.749408-1.pdf]

**Supplemental Table 1. Roche Universal Probe Library primer sequences used in quantitative RT-PCR for markers of adipocyte differentiation, function, and thermogenesis in human fat cells and murine adipose tissue**

| Gene     | Species | Accession#     | L primer                  | R primer                | UPL probe# |
|----------|---------|----------------|---------------------------|-------------------------|------------|
| PPARG2   | mouse   | NM_011146.3    | gaaagacaacggacaaatcacc    | gggggtgatatgttgaacttg   | 7          |
| ADIPOQ   | mouse   | NM_009605.4    | ggagagaaaggagatgcaggt     | cttctgccaggggttc        | 17         |
| FABP4    | mouse   | NM_024406.2    | gggatgaaagtcgaccacaa      | tggaagtcacgccttcata     | 31         |
| DIO2     | mouse   | NM_010050.2    | ctgcgctgtctggaac          | ggagcatctcaccagttt      | 69         |
| MEF2C    | mouse   | NM_001170537.1 | tgatcagcaggcaagattg       | ggatgtaactggcatctcaa    | 10         |
| PPARGC1A | mouse   | NM_008904.2    | gaaagggccaaacagagaga      | gtaaatcacacggcgctctt    | 29         |
| UBE2I    | mouse   | NM_011665.3    | gggttcagggtggaactaagg     | ggacagctacaagccaaaag    | 69         |
| TBP      | mouse   | NM_013684.3    | cggtcgcgtcattttctc        | gggttatctcacaccatga     | 107        |
| CIDEA    | mouse   | NM_007702.2    | aaaccatgaccgaagtagcc      | aggccagttgtgatgactaagac | 66         |
| ADIPOQ   | human   | NM_004797.2    | ggtgagaagggtgagaaagga     | ttcaccgatgtctcccttag    | 85         |
| NRIP1    | human   | NM_003489.3    | tcaggactcattatittaacatttg | tccctgtcctcctcagta      | 76         |
| ATG5     | human   | NM_004849.2    | caactgtttcacgctatcagg     | cactttgcagttaccaacgtca  | 38         |
| UBE2I    | human   | NM_003345.4    | acctcatgaactgggagtg       | tcatcttgaaaagcatccgta   | 12         |
| PRDM16   | human   | NM_022114.2    | tacactgtgcaggcaggcta      | gtgtggagaggagtgtctcg    | 56         |
| TBP      | human   | NM_003194.4    | ccatgactcccatgacc         | ttacaaccaagattcactgtgg  | 51         |
| 18S      | human   |                | ctcaacacgggaaacctcac      | cgctccaccaactaagaacg    | 77         |

**Supplemental Table 2. Taqman® assays used in quantitative RT-PCR for markers of beige adipocytes and miR-30a-5p**

| Gene       | Species | Taqman® Assay |
|------------|---------|---------------|
| PPARG      | human   | Hs01115513_m1 |
| FABP4      | human   | Hs01086177_m1 |
| PPARGC1A   | human   | Hs01016719_m1 |
| UCP1       | human   | Hs00222453_m1 |
| CIDEA      | human   | Hs00154455_m1 |
| BECN1      | human   | Hs00186838_m1 |
| TP53       | human   | Hs00159357_m1 |
| MIR-30A-5P | human   | 000417        |

**Supplemental Table 3. Primers used in ChIP assays for PPAR $\gamma$  binding near the *UCP1* and *CIDEA* coding regions. A commonly used Cyclin D1 intronic region was used as negative control.**

| Gene               | L primer               | R primer             |
|--------------------|------------------------|----------------------|
| UCP1 enhancer      | CACAAAGAAGAAGCAGAGAGGT | TTGCTGCCACTCCTTTGCTA |
| CIDEA intron 1     | GTGAGAGTGTGCCCGAATTC   | ACGCAGGGTTCTCAGTTACA |
| Cyclin D1 intron 4 | ACAGCCAGAAGCTCCAAAAA   | TGCCACACACCAGTGACTTT |
